# Supplementary material for: Microplastic Aerosol Contamination in Porto (Portugal)
Source: Preprints.org preprint supplement (doi:10.20944/preprints202409.0356.v1), 2024-09-04
Supplement: Supplementary file 1 [file supplementary]

**Microplastic Aerosol Contamination in Porto (Portugal)**

Yuliya Logvina 1, Diogo Silva Moreira1, Rui Pedro Moreira Santos1, Inês Filipa Neves1, Helena Ribeiro 2, Luís Pinto da Silva 1, Joaquim Esteves da Silva 1,*

1 Chemistry Research Unit (CIQUP), Institute of Molecular Sciences (IMS)—DGAOT, Faculty of Sciences of University of Porto (FCUP), Rua do Campo Alegre 697, 4169-007 Porto, Portugal; up201407073@edu.fc.up.pt (Y.L.); diogomoreira09871@gmail.com (D.S.M.); up201608495@edu.fc.up.pt (R.P.S.); up202004585@edu.fc.up.pt (I.F.N.); luis.silva@fc.up.pt (L.P.d.S.); jcsilva@fc.up.pt (J.E.S.)

2 Department of Geosciences, Environment and Spatial Plannings, Faculty of Sciences, University of Porto and Earth Sciences Institute (ICT), Pole of the Faculty of Sciences, University of Porto, Portugal; helena.ribeiro@fc.up.pt (H.R.)

* Correspondence: jcsilva@fc.up.pt; Tel.: +351-220-402-569

**SUPPLEMENTARY INFORMATION**

**Table SI1.** Recovery rate data for polymers from the filtration sampling procedure analyzed by optical microscopy.

| **Polymer** | **Polymer morphology** | **Fraction**  **(μm)** | **Status** | **Quantity, (num)** | | |
| --- | --- | --- | --- | --- | --- | --- |
| **1st** | **2d** | **3d** |
| PP | particulate | >125 | add | 30 | 30 | 30 |
| recovered | 18 | 26 | 24 |
| PE-HD | add | 30 | 30 | 30 |
| recovered | 27 | 21 | 21 |
| ABS | add | 30 | 30 | 30 |
| recovered | 21 | 19 | 28 |
| PES | fibrous | >63 | add | 302 | 464 | 225 |
| recovered | 73 | 65 | 37 |
| 63-12 | add | 95 | 110 | 50 |
| recovered | 50 | 28 | 13 |

**Table SI2.** Data from all analyzed air samples for MPs and fibers by optical microscopy.

| **nº** | **Sample** | **Size-fraction, μm** | **Fibers** | **MPs** | | | | | | |
| --- | --- | --- | --- | --- | --- | --- | --- | --- | --- | --- |
| **Red** | **Blue** | **Green** | **Yellow** | **Orange** | **Purple** | **Rose** |
|  | **Control 1/1** | >125 | 6 | 0 | 1 | 0 | 0 | 0 | 0 | 0 |
| 125-63 | 8 | 2 | 0 | 0 | 0 | 0 | 0 | 0 |
| 63-25 | 3 | 0 | 1 | 0 | 0 | 0 | 0 | 0 |
| 25-12 | 6 | 7 | 5 | 0 | 1 | 0 | 0 | 0 |
| 12-1.2 | 6 | 4 | 0 | 0 | 0 | 0 | 0 | 0 |
|  | **Control 1/2** | >125 | 18 | 1 | 0 | 0 | 1 | 0 | 0 | 0 |
| 125-63 | 17 | 1 | 0 | 0 | 0 | 0 | 0 | 0 |
| 63-25 | 35 | 3 | 2 | 0 | 2 | 0 | 0 | 0 |
| 25-12 | 2 | 2 | 0 | 0 | 0 | 0 | 0 | 0 |
| 12-1.2 | 15 | 6 | 2 | 0 | 0 | 0 | 0 | 0 |
|  | **Control 1/3** | >125 | 84 | 4 | 5 | 1 | 0 | 0 | 0 | 0 |
| 125-63 | 66 | 2 | 2 | 0 | 0 | 0 | 0 | 0 |
| 63-25 | 38 | 2 | 2 | 0 | 0 | 0 | 0 | 0 |
| 25-12 | 16 | 3 | 0 | 0 | 0 | 0 | 0 | 0 |
| 12-1.2 | 0 | 5 | 1 | 0 | 0 | 0 | 0 | 0 |
|  | **29.09.22** | >125 | 53 | 12 | 34 | 0 | 2 | 0 | 0 | 0 |
| 125-63 | 31 | 15 | 50 | 2 | 1 | 0 | 0 | 0 |
| 63-25 | 27 | 26 | 30 | 0 | 0 | 0 | 0 | 0 |
| 25-12 | 80 | 17 | 9 | 0 | 0 | 0 | 0 | 0 |
| 12-1.2 | 40 | 11 | 4 | 0 | 0 | 0 | 0 | 1 |
|  | **26.10.22** | >125 | 20* | 20 | 7 | 0 | 1 | 0 | 0 | 1 |
| 125-63 | 22 | 8 | 1 | 1 | 0 | 0 | 0 |
| 63-25 | 21 | 9 | 1 | 1 | 0 | 0 | 0 |
| 25-12 | 52 | 46 | 18 | 2 | 1 | 0 | 0 | 0 |
| 12-1.2 | 63 | 25 | 9 | 0 | 2 | 0 | 0 | 0 |
|  | **09.11.22** | >125 | 11 | 5 | 1 | 0 | 0 | 0 | 0 | 0 |
| 125-63 | 8 | 4 | 0 | 0 | 0 | 0 | 0 | 0 |
| 63-25 | 5 | 4 | 4 | 0 | 1 | 0 | 0 | 0 |
| 25-12 | 7 | 5 | 3 | 0 | 1 | 0 | 0 | 0 |
| 12-1.2 | 32 | 5 | 1 | 0 | 1 | 0 | 0 | 3 |
|  | **23.11.22** | >125 | 9 | 6 | 9 | 0 | 2 | 0 | 0 | 0 |
| 125-63 | 7 | 6 | 7 | 0 | 1 | 0 | 0 | 0 |
| 63-25 | 11 | 5 | 5 | 1 | 0 | 0 | 0 | 0 |
| 25-12 | 11 | 10 | 12 | 0 | 1 | 0 | 0 | 0 |
| 12-1.2 | 23 | 10 | 3 | 0 | 2 | 0 | 0 | 0 |
|  | **07.12.22** | >125 | 3 | 4 | 0 | 0 | 1 | 0 | 0 | 0 |
| 125-63 | 4 | 3 | 5 | 1 | 0 | 0 | 0 | 0 |
| 63-25 | 2 | 3 | 3 | 0 | 0 | 0 | 0 | 0 |
| 25-12 | 1 | 5 | 2 | 1 | 0 | 0 | 0 | 0 |
| 12-1.2 | 13 | 4 | 1 | 0 | 0 | 0 | 0 | 0 |
|  | **21.12.22** | >125 | 2 | 3 | 4 | 3 | 2 | 0 | 0 | 0 |
| 125-63 | 1 | 2 | 4 | 0 | 3 | 0 | 0 | 0 |
| 63-25 | 0 | 1 | 2 | 0 | 0 | 0 | 0 | 0 |
| 25-12 | 5 | 0 | 2 | 2 | 1 | 0 | 0 | 0 |
| 12-1.2 | 64 | 22 | 6 | 0 | 0 | 0 | 0 | 0 |
|  | **04.01.23** | >125 | 3 | 7 | 4 | 1 | 1 | 0 | 0 | 0 |
| 125-63 | 0 | 3 | 2 | 2 | 1 | 0 | 0 | 1 |
| 63-25 | 2 | 2 | 3 | 1 | 0 | 0 | 0 | 0 |
| 25-12 | 3 | 5 | 1 | 1 | 0 | 0 | 0 | 0 |
| 12-1.2 | 58 | 15 | 2 | 0 | 0 | 0 | 0 | 0 |
|  | **18.01.23** | >125 | 3 | 5 | 2 | 1 | 3 | 0 | 0 | 0 |
| 125-63 | 1 | 2 | 5 | 0 | 0 | 0 | 0 | 0 |
| 63-25 | 0 | 5 | 5 | 1 | 2 | 0 | 0 | 0 |
| 25-12 | 0 | 0 | 1 | 0 | 0 | 0 | 0 | 0 |
| 12-1.2 | 54 | 17 | 5 | 0 | 1 | 0 | 0 | 0 |
|  | **Control 2/1** | >125 μm | 8 | 0 | 1 | 0 | 1 | 1 | 0 | 0 |
| 125-63 μm | 8 | 2 | 2 | 1 | 0 | 2 | 0 | 0 |
| 63-25 μm | 10 | 0 | 0 | 0 | 2 | 1 | 0 | 0 |
| 25-12 μm | 19 | 3 | 1 | 0 | 2 | 2 | 0 | 0 |
| 12-1,2 μm | 1 | 5 | 1 | 0 | 0 | 2 | 0 | 0 |
|  | **Control 2/2** | >125 μm | 9 | 0 | 0 | 1 | 0 | 1 | 0 | 0 |
| 125-63 μm | 7 | 1 | 1 | 0 | 1 | 1 | 0 | 0 |
| 63-25 μm | 8 | 2 | 1 | 0 | 1 | 2 | 0 | 0 |
| 25-12 μm | 7 | 9 | 5 | 0 | 1 | 3 | 0 | 0 |
| 12-1,2 μm | 6 | 4 | 0 | 0 | 0 | 2 | 0 | 0 |
|  | **Control 2/3** | >125 μm | 11 | 0 | 1 | 0 | 0 | 1 | 0 | 0 |
| 125-63 μm | 17 | 0 | 0 | 0 | 1 | 2 | 0 | 0 |
| 63-25 μm | 7 | 1 | 1 | 0 | 0 | 0 | 0 | 0 |
| 25-12 μm | 3 | 2 | 2 | 0 | 1 | 2 | 0 | 0 |
| 12-1,2 μm | 17 | 6 | 2 | 0 | 0 | 1 | 0 | 0 |
|  | **01.02.23**** | >125 μm | - | - | - | - | - | - | 0 | 0 |
| 125-63 μm | - | - | - | - | - | - | 0 | 0 |
| 63-25 μm | - | - | - | - | - | - | 0 | 0 |
| 25-12 μm | 21 | 26 | 10 | 2 | 19 | 34 | 0 | 0 |
| 12-1,2 μm | 3 | 8 | 3 | 0 | 4 | 3 | 0 | 0 |
|  | **15.02.23**** | >125 μm | - | - | - | - | - | - | 0 | 0 |
| 125-63 μm | - | - | - | - | - | - | 0 | 0 |
| 63-25 μm | - | - | - | - | - | - | 0 | 0 |
| 25-12 μm | 36 | 23 | 9 | 3 | 19 | 29 | 0 | 0 |
| 12-1,2 μm | 4 | 2 | 2 | 0 | 2 | 5 | 0 | 0 |
|  | **01.03.23** | >125 μm | 8 | 3 | 2 | 0 | 6 | 5 | 0 | 1 |
| 125-63 μm | 14 | 2 | 1 | 0 | 2 | 5 | 0 | 0 |
| 63-25 μm | 7 | 1 | 5 | 0 | 1 | 3 | 0 | 0 |
| 25-12 μm | 33 | 22 | 10 | 1 | 23 | 30 | 0 | 0 |
| 12-1,2 μm | 16 | 10 | 24 | 0 | 14 | 12 | 0 | 0 |
|  | **15.03.23** | >125 μm | 3 | 0 | 4 | 1 | 0 | 0 | 0 | 0 |
| 125-63 μm | 11 | 0 | 0 | 0 | 4 | 4 | 0 | 0 |
| 63-25 μm | 17 | 0 | 2 | 0 | 0 | 5 | 0 | 0 |
| 25-12 μm | 11 | 9 | 4 | 1 | 2 | 8 | 0 | 0 |
| 12-1,2 μm | 2 | 4 | 4 | 0 | 6 | 4 | 0 | 0 |
|  | **26.04.23** | >125 μm | 74 | 20 | 11 | 1 | 41 | 43 | 0 | 0 |
| 125-63 μm | 23 | 12 | 4 | 1 | 28 | 35 | 0 | 0 |
| 63-25 μm | 56 | 59 | 44 | 2 | 63 | 71 | 0 | 0 |
| 25-12 μm | 58 | 36 | 20 | 3 | 50 | 57 | 0 | 1 |
| 12-1,2 μm | 30 | 6 | 30 | 0 | 18 | 24 | 0 | 2 |
|  | **10.05.23** | >125 μm | 59 | 2 | 11 | 0 | 10 | 17 | 0 | 0 |
| 125-63 μm | 49 | 9 | 4 | 0 | 8 | 15 | 0 | 0 |
| 63-25 μm | 95 | 11 | 5 | 0 | 12 | 18 | 0 | 0 |
| 25-12 μm | 128 | 95 | 34 | 8 | 27 | 81 | 0 | 1 |
| 12-1,2 μm | 16 | 4 | 20 | 2 | 8 | 14 | 0 | 0 |
|  | **24.05.23** | >125 μm | 41 | 11 | 3 | 1 | 8 | 13 | 0 | 0 |
| 125-63 μm | 36 | 16 | 2 | 1 | 5 | 15 | 0 | 0 |
| 63-25 μm | 35 | 32 | 6 | 1 | 21 | 26 | 0 | 0 |
| 25-12 μm | 92 | 59 | 25 | 8 | 29 | 40 | 0 | 0 |
| 12-1,2 μm | 18 | 2 | 4 | 2 | 16 | 12 | 0 | 0 |
|  | **07.06.23** | >125 μm | 20 | 0 | 5 | 0 | 5 | 7 | 0 | 0 |
| 125-63 μm | 35 | 1 | 5 | 0 | 3 | 4 | 0 | 0 |
| 63-25 μm | 37 | 12 | 5 | 0 | 8 | 11 | 0 | 0 |
| 25-12 μm | 16 | 26 | 4 | 7 | 12 | 17 | 0 | 0 |
| 12-1,2 μm | 24 | 12 | 16 | 0 | 10 | 18 | 0 | 0 |
|  | **21.06.23** | >125 μm | 36 | 2 | 6 | 0 | 4 | 7 | 0 | 0 |
| 125-63 μm | 19 | 6 | 0 | 0 | 3 | 4 | 0 | 0 |
| 63-25 μm | 24 | 12 | 7 | 1 | 8 | 13 | 0 | 0 |
| 25-12 μm | 26 | 32 | 12 | 7 | 17 | 24 | 0 | 1 |
| 12-1,2 μm | 22 | 12 | 12 | 2 | 6 | 20 | 0 | 2 |
|  | **05.07.23** | >125 μm | 23 | 6 | 7 | 0 | 4 | 12 | 0 | 0 |
| 125-63 μm | 31 | 13 | 4 | 0 | 6 | 10 | 0 | 0 |
| 63-25 μm | 14 | 30 | 3 | 1 | 9 | 31 | 0 | 0 |
| 25-12 μm | 17 | 23 | 12 | 1 | 10 | 15 | 0 | 1 |
| 12-1,2 μm | 4 | 6 | 20 | 0 | 14 | 22 | 0 | 0 |
|  | **Control 3/1** | >125 | 19 | 0 | 2 | 6 | 1 | 12 | 0 | 0 |
| 125-63 | 53 | 0 | 2 | 0 | 1 | 3 | 0 | 0 |
| 63-25 | 35 | 0 | 3 | 0 | 3 | 3 | 0 | 0 |
| 25-12 | 84 | 0 | 18 | 0 | 10 | 20 | 0 | 0 |
| 12-1.2 | 8 | 0 | 11 | 0 | 0 | 0 | 0 | 1 |
|  | **Control 3/2** | >125 | 77 | 0 | 13 | 0 | 7 | 3 | 0 | 0 |
| 125-63 | 61 | 0 | 5 | 0 | 0 | 1 | 0 | 1 |
| 63-25 | 87 | 0 | 4 | 0 | 1 | 2 | 0 | 0 |
| 25-12 | 17 | 0 | 8 | 0 | 2 | 4 | 0 | 0 |
| 12-1.2 | 1 | 0 | 0 | 0 | 0 | 0 | 0 | 0 |
|  | **Control 3/3** | >125 | 45 | 2 | 6 | 1 | 0 | 0 | 0 | 0 |
| 125-63 | 65 | 2 | 2 | 0 | 0 | 0 | 0 | 0 |
| 63-25 | 42 | 0 | 8 | 0 | 0 | 0 | 0 | 0 |
| 25-12 | 18 | 0 | 2 | 0 | 10 | 1 | 0 | 0 |
| 12-1.2 | 2 | 0 | 0 | 0 | 0 | 0 | 0 | 0 |
|  | **05.12.23** | >125 | 33 | 0 | 0 | 1 | 2 | 0 | 0 | 0 |
| 125-63 | 18 | 0 | 2 | 0 | 5 | 3 | 0 | 0 |
| 63-25 | 21 | 0 | 1 | 0 | 6 | 3 | 0 | 0 |
| 25-12 | 18 | 1 | 7 | 4 | 64 | 28 | 0 | 2 |
| 12-1.2 | 19 | 0 | 1 | 0 | 2 | 0 | 0 | 2 |
|  | **19.12.23** | >125 | 72 | 0 | 4 | 1 | 33 | 4 | 0 | 1 |
| 125-63 | 60 | 0 | 3 | 0 | 42 | 0 | 0 | 0 |
| 63-25 | 23 | 0 | 4 | 0 | 11 | 3 | 0 | 1 |
| 25-12 | 35 | 3 | 30 | 5 | 37 | 8 | 0 | 3 |
| 12-1.2 | 26 | 0 | 6 | 0 | 3 | 0 | 0 | 0 |
|  | **23.01.24** | >125 | 33 | 1 | 4 | 0 | 5 | 0 | 0 | 0 |
| 125-63 | 22 | 0 | 1 | 0 | 6 | 0 | 0 | 0 |
| 63-25 | 39 | 1 | 9 | 0 | 2 | 1 | 0 | 1 |
| 25-12 | 55 | 6 | 41 | 5 | 60 | 10 | 4 | 2 |
| 12-1.2 | 38 | 0 | 8 | 0 | 0 | 0 | 0 | 0 |
|  | **06.02.24** | >125 | 14 | 0 | 0 | 0 | 0 | 0 | 0 | 0 |
| 125-63 | 10 | 0 | 1 | 0 | 0 | 0 | 0 | 0 |
| 63-25 | 28 | 0 | 8 | 0 | 9 | 1 | 1 | 0 |
| 25-12 | 92 | 2 | 26 | 4 | 44 | 3 | 4 | 4 |
| 12-1.2 | 43 | 0 | 5 | 1 | 2 | 0 | 1 | 0 |
|  | **20.02.24** | >125 | 29 | 0 | 7 | 2 | 13 | 4 | 0 | 0 |
| 125-63 | 38 | 0 | 1 | 0 | 20 | 0 | 0 | 0 |
| 63-25 | 24 | 0 | 5 | 2 | 78 | 21 | 0 | 0 |
| 25-12 | 38 | 1 | 7 | 3 | 63 | 19 | 0 | 0 |
| 12-1.2 | 34 | 0 | 7 | 0 | 3 | 0 | 0 | 4 |
|  | **05.03.24** | >125 | 80 | 1 | 14 | 0 | 2 | 0 | 0 | 0 |
| 125-63 | 71 | 0 | 30 | 0 | 19 | 0 | 0 | 0 |
| 63-25 | 73 | 0 | 2 | 0 | 5 | 0 | 0 | 0 |
| 25-12 | 38 | 0 | 26 | 3 | 120 | 0 | 1 | 2 |
| 12-1.2 | 22 | 0 | 5 | 0 | 0 | 0 | 0 | 4 |

* The value is a sum of three fractions. ** Don’t exist data for fractions. >125 μm;

125-63 μm and 63-25 μm.

**Table SI3.** Independent variables calculated from meteo data for PCA and PCR analyses for each sampling period.

| **Nº** | **Data** | **Wind, max,**  **m/s** | **Wind, avr,**  **m/s** | **Wind max max,**  **m/s** | **Wind avr max,**  **m/s** | **Precip. total,**  **mm** | **Precip. occurence, n** | **Temperat. avr max, ºC** | **Temperat. (avr min), ºC** | **Temperat. (avr avr), ºC** | **Temperat (max), ºC** | **Temperat. (min), ºC** | **Humidity (avr max), %** | **Humidity (avr min), %** | **Humidity (avr avr), %** | **Humidity (max), %** | **Humidity (min), %** |
| --- | --- | --- | --- | --- | --- | --- | --- | --- | --- | --- | --- | --- | --- | --- | --- | --- | --- |
| **1** | **29.sep.22** | 6.03 | 1.75 | 12.73 | 7.32 | 78.01 | 14.00 | 23.57 | 17.52 | 19.99 | 32.57 | 12.88 | 91.61 | 67.31 | 82.38 | 96.76 | 34.07 |
| **2** | **26.oct.22** | 7.27 | 1.78 | 14.83 | 7.73 | 96.91 | 27.00 | 21.96 | 14.78 | 17.93 | 29.09 | 12.23 | 92.99 | 68.60 | 83.56 | 96.68 | 35.57 |
| **3** | **09.nov.22** | 5.05 | 1.66 | 12.73 | 8.01 | 150.84 | 18.00 | 19.80 | 13.48 | 16.23 | 25.25 | 8.59 | 94.61 | 70.54 | 86.40 | 96.05 | 54.81 |
| **4** | **23.nov.22** | 7.79 | 2.49 | 13.93 | 8.99 | 256.91 | 20.00 | 18.25 | 13.16 | 15.50 | 23.76 | 9.87 | 95.16 | 73.89 | 87.73 | 97.41 | 52.80 |
| **5** | **07.dec.22** | 5.35 | 1.69 | 12.58 | 7.16 | 66.27 | 11.00 | 16.21 | 9.70 | 12.24 | 19.13 | 6.56 | 90.17 | 67.30 | 81.72 | 96.83 | 87.09 |
| **6** | **21.dec.22** | 8.63 | 2.54 | 16.93 | 10.10 | 170.54 | 24.00 | 16.57 | 12.06 | 14.34 | 18.32 | 7.38 | 94.15 | 78.36 | 87.57 | 97.02 | 94.94 |
| **7** | **04.jan.23** | 8.08 | 2.85 | 15.65 | 9.74 | 239.80 | 17.00 | 16.44 | 11.81 | 13.88 | 18.83 | 5.38 | 95.47 | 78.33 | 89.15 | 97.19 | 96.59 |
| **8** | **18.jan.23** | 8.87 | 2.34 | 16.10 | 9.38 | 158.40 | 15.00 | 15.26 | 9.37 | 12.02 | 18.26 | 5.58 | 92.04 | 69.67 | 83.73 | 96.61 | 85.61 |
| **9** | **01.feb.23** | 5.12 | 1.69 | 11.68 | 8.19 | 15.92 | 5.00 | 14.29 | 5.84 | 9.57 | 17.20 | 3.05 | 85.65 | 53.64 | 72.20 | 95.74 | 85.99 |
| **10** | **15.feb.23** | 6.10 | 2.43 | 12.43 | 8.37 | 0.20 | 1.00 | 17.82 | 9.11 | 12.75 | 21.00 | 6.53 | 67.34 | 40.11 | 55.42 | 76.89 | 48.21 |
| **11** | **01.mar.23** | 4.28 | 1.33 | 8.75 | 6.37 | 5.77 | 4.00 | 16.87 | 8.24 | 12.03 | 23.03 | 2.96 | 81.13 | 49.18 | 66.58 | 90.84 | 78.06 |
| **12** | **15.mar.23** | 8.02 | 2.26 | 13.78 | 8.03 | 52.93 | 17.00 | 15.83 | 10.11 | 12.76 | 19.38 | 4.20 | 91.91 | 68.20 | 83.01 | 97.16 | 95.45 |
| **13** | **26.apr.23** | 4.83 | 1.69 | 10.33 | 7.74 | 40.20 | 9.00 | 20.16 | 12.84 | 16.22 | 29.81 | 8.41 | 88.19 | 60.01 | 75.22 | 96.32 | 85.47 |
| **14** | **10.may.23** | 4.78 | 1.43 | 9.87 | 7.14 | 10.35 | 6.00 | 22.32 | 13.91 | 18.09 | 29.57 | 0.00 | 91.66 | 61.92 | 79.96 | 95.79 | 74.93 |
| **15** | **24.may.23** | 7.22 | 2.63 | 12.80 | 9.86 | 0.60 | 1.00 | 23.88 | 14.90 | 19.07 | 28.13 | 11.57 | 73.52 | 40.30 | 56.86 | 90.01 | 59.38 |
| **16** | **07.jun.23** | 5.08 | 1.25 | 11.83 | 7.16 | 18.90 | 7.00 | 22.14 | 16.41 | 18.77 | 28.00 | 15.54 | 92.41 | 67.88 | 81.56 | 95.68 | 88.36 |
| **17** | **21.jun.23** | 4.95 | 1.67 | 12.50 | 7.92 | 43.38 | 10.00 | 23.15 | 17.34 | 19.86 | 28.74 | 15.55 | 92.87 | 69.77 | 84.18 | 96.04 | 83.14 |
| **18** | **05.jul.23** | 4.01 | 1.30 | 10.55 | 7.11 | 0.00 | 0.00 | 27.06 | 17.51 | 21.63 | 31.89 | 15.86 | 89.31 | 57.01 | 75.94 | 94.04 | 67.91 |
| **19** | **05.dec.23** | 6.13 | 1.50 | 13.63 | 7.52 | 65.27 | 13.00 | 16.25 | 9.54 | 12.57 | 19.85 | 6.19 | 90.90 | 66.64 | 81.17 | 100.00 | 93.77 |
| **20** | **19.dec.23** | 5.90 | 2.19 | 11.83 | 8.04 | 107.26 | 15.00 | 15.66 | 9.64 | 12.25 | 18.99 | 2.28 | 88.21 | 67.79 | 80.91 | 97.25 | 90.03 |
| **21** | **23.jan.24** | 7.25 | 2.36 | 14.83 | 8.95 | 104.67 | 19.00 | 15.18 | 10.29 | 12.53 | 19.60 | 6.07 | 92.60 | 71.74 | 84.75 | 97.66 | 96.89 |
| **22** | **06.feb.24** | 4.11 | 1.25 | 8.83 | 5.25 | 0.00 | 0.00 | 20.31 | 11.13 | 14.55 | 24.10 | 9.44 | 87.85 | 59.38 | 76.75 | 92.89 | 82.19 |
| **23** | **20.feb.24** | 8.23 | 2.01 | 17.00 | 9.26 | 95.32 | 23.00 | 18.08 | 11.75 | 14.60 | 24.92 | 8.54 | 93.22 | 67.99 | 84.52 | 96.99 | 84.45 |
| **24** | **05.mar.24** | 9.69 | 2.68 | 15.50 | 11.14 | 109.05 | 26.00 | 15.06 | 9.07 | 11.98 | 20.95 | 6.71 | 91.98 | 63.93 | 81.08 | 96.32 | 80.14 |
